# Supplementary material for: Regenerative agriculture: merging farming and natural resource conservation profitably
Source: PeerJ. 2018 Feb 26;6:e4428. doi: 10.7717/peerj.4428 (PMC5831153; doi:10.7717/peerj.4428)
Supplement: Supplemental Information 1 — The raw data used to generate the published results. [file peerj-06-4428-s001.xlsx]

## Sheet: Database
Study Year	Farm	Treatment	Field	Weight/3 transects (7.31 m2) g	Yield kg/ha (Jon)	bu/ac	Selling price/bu	Gross profit/acre based on yield	Other income/acre	Gross income/ac all income	Costs per acre	Net profit/ac	net profit/ha	Pest total	SOM	POM	fPOM	Bulk density (g/cm3)
2015	BG	Control	1	13253.5	18130.6	262.392	3.75	983.971	0	983.971	285.7	698.271	1724.73	31	45.245	19.7012	18.2307	1.0531
2015	BG	Control	2	11261.6	15405.7	237.797	3.75	891.739	0	891.739	285.7	606.039	1496.92	7
2015	BG	Control	3	9014	12331.1	181.345	3.75	680.043	0	680.043	285.7	394.343	974.027	29
2015	BG	Control	4	11093.1	15175.2	224.371	3.75	841.392	0	841.392	285.7	555.692	1372.56	14
2015	KH	Control	1	8944.4	12235.8	189.179	3.75	709.423	0	709.423	312.44	396.983	980.548	0	55.489	22.3584	20.0723	1.0688
2015	KH	Control	2	9184.2	12563.9	199.738	3.75	749.019	0	749.019	312.44	436.579	1078.35	1
2015	KH	Control	3	8388.1	11474.8	175.773	3.75	659.148	0	659.148	312.44	346.708	856.37	1
2015	KH	Control	4	11838.1	16194.4	247.252	3.75	927.194	0	927.194	312.44	614.754	1518.44	2
2015	LHG	Control	1	5309.1	7262.79	119.984	3.06	367.15	0	367.15	170.35	196.8	486.097	210	38.539	16.4807	15.0064	1.1488
2015	LHG	Control	2	5721.7	7827.22	132.872	3.06	406.588	0	406.588	170.35	236.238	583.507	310
2015	LHG	Control	3	5086.6	6958.41	120.357	3.06	368.293	0	368.293	170.35	197.943	488.919	198
2015	LHG	Control	4	4720.6	6457.73	120.118	3.06	367.561	0	367.561	170.35	197.211	487.11	351
2015	SWG	Control	1	4028.9	5511.49	90.3634	3.06	276.512	0	276.512	170.35	106.162	262.22	279	62.611	10.5217	9.33988	0.9871
2015	SWG	Control	2	4655.4	6368.54	104.891	3.06	320.965	0	320.965	170.35	150.615	372.02	439
2015	SWG	Control	3	4302.5	5885.77	94.3472	3.06	288.702	0	288.702	170.35	118.352	292.33	509
2015	SWG	Control	4	3450.1	4719.7	79.0297	3.06	241.831	0	241.831	170.35	71.481	176.558	223
2015	CS	Control	1	10770.4	14733.8	230.463	3.4	783.573	0	783.573	347.16	436.413	1077.94	375	55.208	18.5351	17.0301	1.3407
2015	CS	Control	2	9122.6	12479.6	200.63	3.4	682.142	0	682.142	347.16	334.982	827.406	34
2015	CS	Control	3	8888.9	12159.9	192.014	3.4	652.849	0	652.849	347.16	305.689	755.052	698
2015	CS	Control	4	8902.7	12178.8	195.341	3.4	664.16	0	664.16	347.16	317	782.99	1966
2015	LG	Control	1	3790.3	5185.09	87.0588								145	47.5	18.9797	8.6644	1.2399
2015	LG	Control	2	6889.2	9424.35	161.43								27
2015	LG	Control	3	5741.8	7854.72	133.914								6
2015	LG	Control	4	6175.6	8448.15	143.311								9
2015	WK	Control	1	7681.5	10508.2	174.788	3.4	594.28	0	594.28	298.96	295.32	729.441	14	63.795	13.557	13.557	1.0994
2015	WK	Control	2	7574.6	10362	176.593	3.4	600.416	0	600.416	298.96	301.456	744.596	5
2015	WK	Control	3	8782.2	12014	197.269	3.4	670.714	0	670.714	298.96	371.754	918.233	3
2015	WK	Control	4	7648.8	10463.5	177.866	3.4	604.744	0	604.744	298.96	305.784	755.287	9
2016	DH	Control	1	13484.1	18446.1	264.989	3.4	900.961	0	900.961	321.48	579.481	1431.32	4	73.628	15.6607	14.4606	1.1545
2016	DH	Control	2	14851.1	20316.1	286.002	3.4	972.408	0	972.408	321.48	650.928	1607.79	158
2016	DH	Control	3	11336.7	15508.5	224.492	3.4	763.273	0	763.273	321.48	441.793	1091.23	39
2016	DH	Control	4	13438.5	18383.7	259.647	3.4	882.799	0	882.799	321.48	561.319	1386.46	143
2016	TN	Control	1	12031.8	16459.4	222.745	3.2	712.783	0	712.783	245.64	467.143	1153.84	25	81.794	15.1217	13.7502	1.1138
2016	TN	Control	2	10654.1	14574.7	198.709	3.2	635.869	0	635.869	245.64	390.229	963.865	13
2016	TN	Control	3	11001.7	15050.2	198.957	3.2	636.664	0	636.664	245.64	391.024	965.828	54
2016	TN	Control	4	11599.5	15868	211.237	3.2	675.958	0	675.958	245.64	430.318	1062.88	3
2016	JA	Control	1	8390.1	11477.6	159.394	2.8	446.304	0	446.304	150.3	296.004	731.131	60	62.61	10.5217	5.8441	1.4015
2016	JA	Control	2	10621.7	14530.4	204.617	2.8	572.928	0	572.928	150.3	422.628	1043.89	24
2016	JA	Control	3	9222.5	12616.3	171.407	2.8	479.94	0	479.94	150.3	329.64	814.21	46
2016	JA	Control	4	8650.7	11834.1	163.371	2.8	457.439	0	457.439	150.3	307.139	758.634	10
2015	KB	Cover	1	4997.7	6836.8	107.631	14	1506.84	0	1506.84	191.62	1315.22	3248.58	2	62.3	25.6927	24.5969	0.8807
2015	KB	Cover	2	5093.8	6968.26	106.059	14	1484.82	0	1484.82	191.62	1293.2	3194.21	0
2015	KB	Cover	3	5315.2	7271.14	111.448	14	1560.27	0	1560.27	191.62	1368.65	3380.58	7
2015	KB	Cover	4	4930.9	6745.42	101.899	14	1426.58	0	1426.58	191.62	1234.96	3050.36	5
2015	SG	Cover	1	8560.5	11710.7	189.857	3.67	696.776	0	696.776	222.31	474.466	1171.93	126	62.053	21.9519	20.5112	0.7984
2015	SG	Cover	2	9373.8	12823.3	200.578	3.67	736.123	0	736.123	222.31	513.813	1269.12	81
2015	SG	Cover	3	10502.7	14367.6	220.558	3.67	809.449	0	809.449	222.31	587.139	1450.23	3
2015	SG	Cover	4	11094.7	15177.4	235.437	3.67	864.052	0	864.052	222.31	641.742	1585.1	13
2015	GB	Cover	1	2219.9	3036.8	57.8005	12	693.606	55	748.606	31.47	717.136	1771.33	13	41.856	33.0921	30.0204	0.9602
2015	GB	Cover	2	3932	5378.93	100.901	12	1210.81	55	1265.81	31.47	1234.34	3048.83	22
2015	GB	Cover	3	2479.9	3392.48	62.9268	12	755.122	55	810.122	31.47	778.652	1923.27	19
2015	GB	Cover	4	1789.2	2447.61	44.753	12	537.036	55	592.036	31.47	560.566	1384.6	10
2015	MEN	Cover	1	2901.7	3969.49	67.082	3.06	205.271	12.5	217.771	98.45	119.321	294.722	37	58.207	20.3023	19.0577	0.9895
2015	MEN	Cover	2	3941.7	5392.2	88.2724	3.06	270.114	12.5	282.614	98.45	184.164	454.884	19
2015	MEN	Cover	3	5478.9	7495.08	122.064	3.06	373.515	12.5	386.015	98.45	287.565	710.286	27
2015	MEN	Cover	4	4129	5648.43	90.0741	3.06	275.627	12.5	288.127	98.45	189.677	468.502	22
2015	MP	Cover	1	1991.9	2724.9	46.6579								24	67.16	10.1461	5.9356	1.5959
2015	MP	Cover	2	1968.4	2692.75	45.562								10
2015	MP	Cover	3	1798.9	2460.88	41.0393								25
2015	MP	Cover	4	2626	3592.34	59.3602								17
2015	DD	Cover	1	6167.1	8436.53	136.16	9.3	1266.28	0	1266.28	118.86	1147.42	2834.14	9				0.9814
2015	DD	Cover	2	7862.1	10755.3	168.401	9.3	1566.13	0	1566.13	118.86	1447.27	3574.75	4
2015	DD	Cover	3	8149.3	11148.2	176.707	9.3	1643.37	0	1643.37	118.86	1524.51	3765.54	3
2015	DD	Cover	4	6716.7	9188.37	147.859	9.3	1375.09	0	1375.09	118.86	1256.23	3102.89	1
2015	GBA	Cover	1	9556.9	13073.7	213.247	3.4	725.041	0	725.041	275.02	450.021	1111.55	9	75.968	16.3302	15.2195	1.1858
2015	GBA	Cover	2	6158.1	8424.21	141.819	3.4	482.185	0	482.185	275.02	207.165	511.698
2015	GBA	Cover	3	9729.5	13309.8	209.129	3.4	711.037	0	711.037	275.02	436.017	1076.96	19
2015	GBA	Cover	4	9232.9	12630.5	205.156	3.4	697.532	0	697.532	275.02	422.512	1043.6	5
2016	LK	Cover	1	3212.8	4395.08	71.3172	8	570.538	57	627.538	141.28	486.258	1201.06	20	75.277	13.526	12.2598	1.1068
2016	LK	Cover	2	3939.1	5388.65	83.0137	8	664.11	57	721.11	141.28	579.83	1432.18	4
2016	LK	Cover	3	6854.7	9377.15	139.795	8	1118.36	57	1175.36	141.28	1034.08	2554.18	3
2016	LK	Cover	4	3604.6	4931.05	77.368	8	618.944	57	675.944	141.28	534.664	1320.62	1
2016	JH	Cover	1	12573.8	17200.8	248.168	3.2	794.136	27	821.136	272.62	548.516	1354.84	36	81.737	17.7131	16.2727	1.2173
2016	JH	Cover	2	10637.9	14552.5	190.107	3.2	608.344	27	635.344	272.62	362.724	895.928	5
2016	JH	Cover	3	11624.2	15901.8	234.62	3.2	750.785	27	777.785	272.62	505.165	1247.76	6
2016	JH	Cover	4	11432.3	15639.3	213.995	3.2	684.782	27	711.782	272.62	439.162	1084.73	18
2016	AS	Cover	1	5651.9	7731.74	111.23	2.8	311.445	43	354.445	184.94	169.505	418.676	3	45.558	14.5883	10.9814	1.4322
2016	AS	Cover	2	6599.2	9027.63	127.414	2.8	356.76	43	399.76	184.94	214.82	530.605	4
2016	AS	Cover	3	5022.2	6870.31	94.9796	2.8	265.943	43	308.943	184.94	124.003	306.287	3
2016	AS	Cover	4	8151.1	11150.6	156.485	2.8	438.158	43	481.158	184.94	296.218	731.658	3
